# Supplementary material
Source: PubMed Central journal article supplement (PMC8885972)
Supplement: NIHMS1774448-supplement-1.pdf [file NIHMS1774448-supplement-1.pdf]

# Full unedited gel for Figure 3

## OXPPOS and respective VDAC

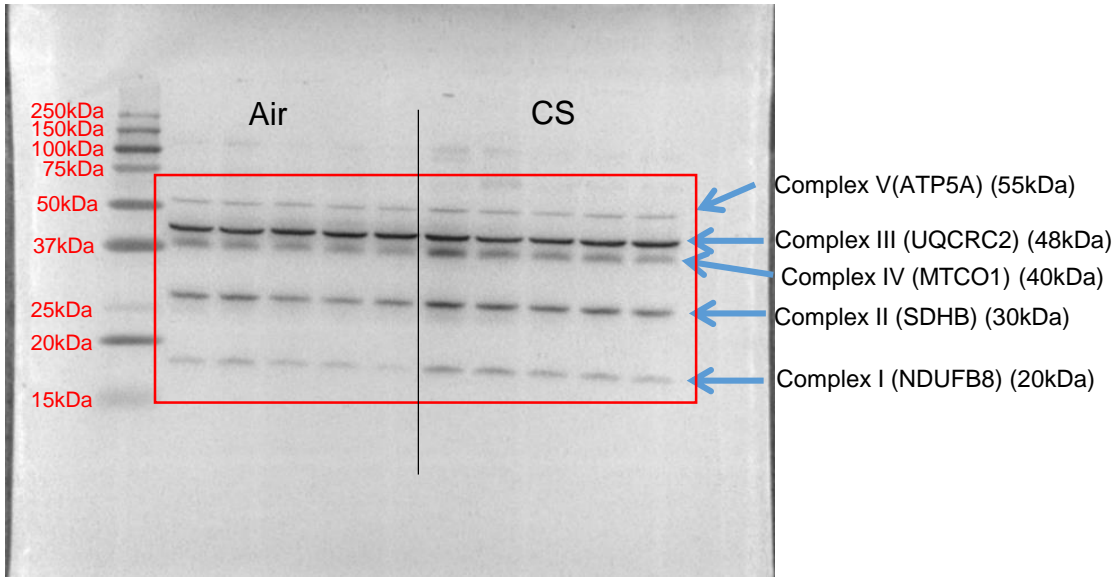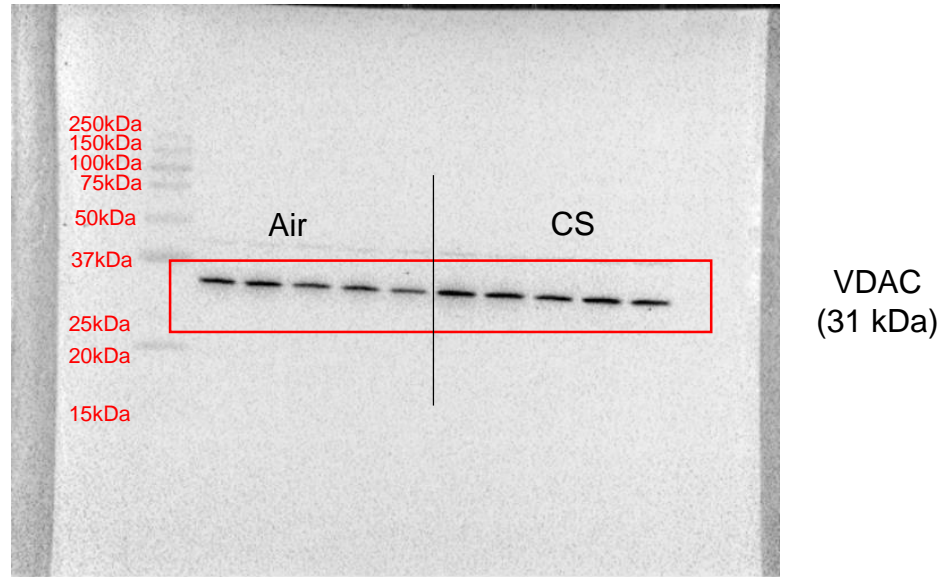

VDAC was used as endogenous control for protein isolated mitochondrial

# Full unedited gel for Figure 5

## Opa1, Pink1 and respective VDAC

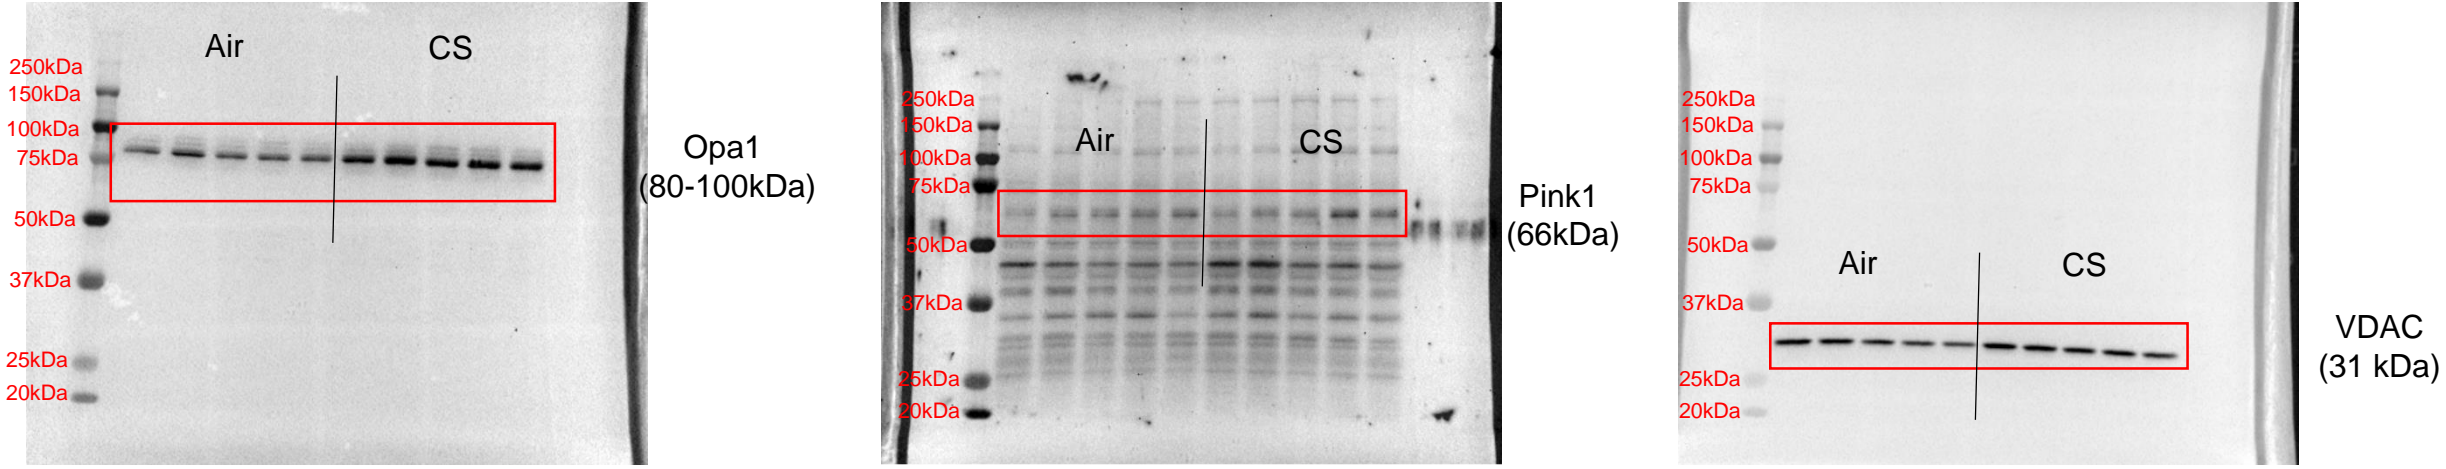

Opa1 and Pink1 were probed in the same membrane, and normalized to VDAC

VDAC was used as endogenous control for protein isolated mitochondrial

# Full unedited gel for Figure 5

## Parkin, Drp1 and Respective VDAC

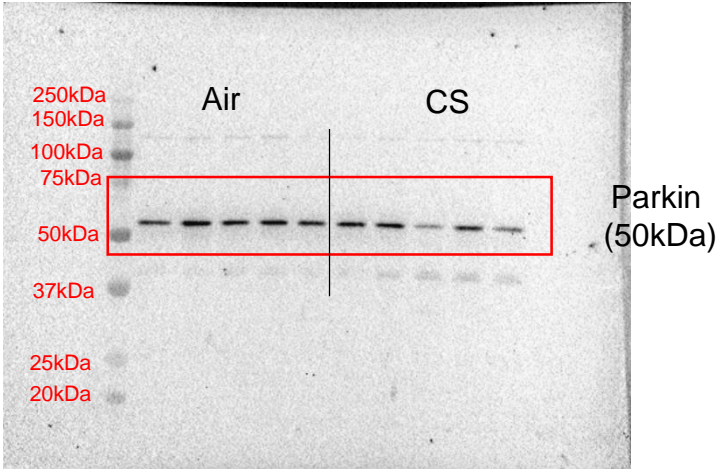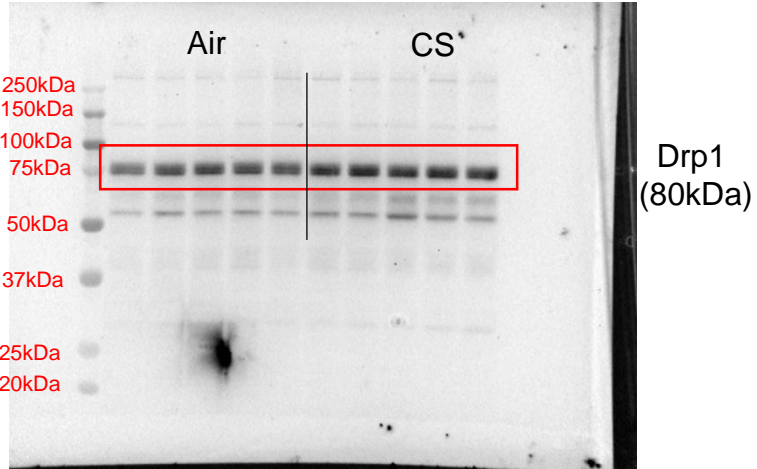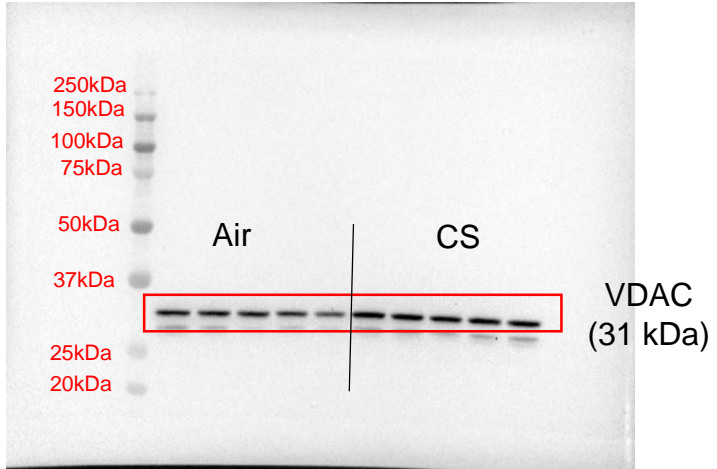

Parkin and DRP1 were probed in the same membrane, and normalized to VDAC

VDAC was used as endogenous control for protein isolated mitochondrial
